# Supplementary material for: σ-Hole halogen bonding interactions in a mixed valence cobalt(iii/ii) complex and anti-electrostatic hydrogen bonding interaction in a cobalt(iii) complex: a theoretical insight
Source: Royal Society of Chemistry journal article supplement (doi:10.1039/c8ce01323c), 2018-01-01
Supplement: c8ce01323c1.pdf [file c8ce01323c1.pdf]

**$\sigma$ -hole halogen bonding interactions in a mixed valence cobalt(III/II) complex  
and anti-electrostatic hydrogen bonding interaction in a cobalt(III) complex:  
A theoretical insight**

**Kousik Ghosh<sup>a</sup>, Klaus Harms<sup>b</sup>, Antonio Bauzá<sup>c</sup>, Antonio Frontera<sup>c,\*</sup> and Shouvik  
Chattopadhyay<sup>a,\*</sup>**

<sup>a</sup>*Department of Chemistry, Inorganic Section, Jadavpur University, Kolkata - 700032, India. Tel:  
+913324572147 e-mail: [shouvik.chem@gmail.com](mailto:shouvik.chem@gmail.com)*

<sup>b</sup>*Fachbereich Chemie, Philipps-Universität Marburg, Hans-Meerwein-Strasse, D-35032 Marburg,  
Germany*

<sup>c</sup>*Departamento de Química, Universitat de les Illes Balears, Crta. de Valldemossa km 7.5, 07122 Palma  
(Balears), Spain*

---

**Table S1:** Selected bond lengths (Å) of complexes **1** and **2**.

|              | <b>1</b>   | <b>2</b>   |
|--------------|------------|------------|
| Co(1)–O(1)   | 1.9024(18) | 1.8946(16) |
| Co(1)–O(1AC) | 1.8973(19) | –          |
| Co(1)–O(2)   | 1.9199(18) | –          |
| Co(1)–N(1)   | 1.9240(2)  | 1.9252(19) |
| Co(1)–N(2)   | 1.9230(2)  | 1.9601(19) |
| Co(1)–N(3)   | 1.8990(2)  | –          |
| Co(2)–O(1)   | 2.1381(18) | –          |
| Co(2)–O(2)   | 2.1177(18) | –          |
| Co(2)–O(3)   | 2.1461(18) | 1.9166(15) |
| Co(2)–O(2AC) | 2.0356(19) | –          |

|                         |            |            |
|-------------------------|------------|------------|
| Co(2)–O(4)              | 2.0674(17) | –          |
| Co(2)–O(3AC)            | 2.0524(19) | –          |
| Co(3)–O(4AC)            | 1.9063(19) | –          |
| Co(3)–O(3)              | 1.9263(17) | –          |
| Co(3)–O(4)              | 1.9033(18) | –          |
| Co(3)–N(4)              | 1.9340(2)  | –          |
| Co(3)–N(5)              | 1.9270(2)  | –          |
| Co(3)–N(6)              | 1.8970(2)  | –          |
| Co(1)–N(1) <sup>a</sup> | –          | 1.9252(19) |
| Co(1)–O(1) <sup>a</sup> | –          | 1.8946(16) |
| Co(1)–N(2) <sup>a</sup> | –          | 1.9601(19) |
| Co(2)–N(5)              | –          | 1.9244(19) |
| Co(2)–O(3) <sup>b</sup> | –          | 1.9166(15) |
| Co(2)–N(5) <sup>b</sup> | –          | 1.9244(19) |
| Co(2)–N(6)              | –          | 1.9610(2)  |
| Co(2)–N(6) <sup>b</sup> | –          | 1.9610(2)  |
| Co(3)–N(9)              | –          | 1.9234(18) |
| Co(3)–N(10)             | –          | 1.9740(19) |
| Co(3)–N(11)             | –          | 1.9590(2)  |
| Co(3)–N(14)             | –          | 1.9630(2)  |
| Co(3)–N(17)             | –          | 1.9763(19) |
| Co(3)–O(5)              | –          | 1.9008(16) |

Symmetry transformation: <sup>a</sup> = 1-X,1-Y, -Z and <sup>b</sup> = 1-X,2-Y,1-Z.

**Table S2:** Selected bond angles (°) of complexes **1** and **2**.

|                   | <b>1</b>  | <b>2</b> |
|-------------------|-----------|----------|
| O(1)–Co(1)–O(1AC) | 94.15(8)  |          |
| O(1)–Co(1)–O(2)   | 81.12(8)  |          |
| O(1)–Co(1)–N(1)   | 92.97(9)  | 90.37(8) |
| O(1)–Co(1)–N(2)   | 172.48(9) | 87.79(8) |
| O(1)–Co(1)–N(3)   | 90.28(9)  |          |
| O(1AC)–Co(1)–O(2) | 92.98(8)  |          |
| O(1AC)–Co(1)–N(1) | 85.15(9)  |          |
| O(1AC)–Co(1)–N(2) | 86.81(9)  |          |
| O(1AC)–Co(1)–N(3) | 174.31(9) |          |
| O(2)–Co(1)–N(1)   | 173.67(9) |          |
| O(2)–Co(1)–N(2)   | 91.39(9)  |          |
| O(2)–Co(1)–N(3)   | 91.24(9)  |          |
| N(1)–Co(1)–N(2)   | 94.54(10) | 88.67(8) |
| N(1)–Co(1)–N(3)   | 91.06(10) |          |
| N(2)–Co(1)–N(3)   | 89.27(10) |          |
| O(1)–Co(2)–O(2)   | 71.46(7)  |          |
| O(1)–Co(2)–O(3)   | 105.10(7) |          |

|                     |           |  |
|---------------------|-----------|--|
| O(1)–Co(2)–O(2AC)   | 86.27(7)  |  |
| O(1)–Co(2)–O(4)     | 105.88(7) |  |
| O(1)–Co(2)–O(3AC)   | 164.34(7) |  |
| O(2)–Co(2)–O(3)     | 108.04(7) |  |
| O(2)–Co(2)–O(2AC)   | 89.35(7)  |  |
| O(2)–Co(2)–O(4)     | 177.34(7) |  |
| O(2)–Co(2)–O(3AC)   | 93.57(7)  |  |
| O(3)–Co(2)–O(2AC)   | 161.42(7) |  |
| O(3)–Co(2)–O(4)     | 72.47(7)  |  |
| O(3)–Co(2)–O(3AC)   | 83.54(7)  |  |
| O(2AC)–Co(2)–O(4)   | 90.46(7)  |  |
| O(2AC)–Co(2)–O(3AC) | 89.04(7)  |  |
| O(4)–Co(2)–O(3AC)   | 89.08(7)  |  |
| O(4AC)–Co(3)–O(3)   | 92.79(8)  |  |
| O(4AC)–Co(3)–O(4)   | 92.84(8)  |  |
| O(4AC)–Co(3)–N(4)   | 87.29(9)  |  |
| O(4AC)–Co(3)–N(5)   | 86.16(8)  |  |
| O(4AC)–Co(3)–N(6)   | 175.07(9) |  |
| O(3)–Co(3)–O(4)     | 81.16(7)  |  |
| O(3)–Co(3)–N(4)     | 93.10(8)  |  |
| O(3)–Co(3)–N(5)     | 171.67(8) |  |
| O(3)–Co(3)–N(6)     | 91.09(8)  |  |
| O(4)–Co(3)–N(4)     | 174.25(8) |  |

|                                            |          |          |
|--------------------------------------------|----------|----------|
| O(4)–Co(3)–N(5)                            | 90.63(8) |          |
| O(4)–Co(3)–N(6)                            | 90.76(9) |          |
| N(4)–Co(3)–N(5)                            | 95.11(9) |          |
| N(4)–Co(3)–N(6)                            | 89.48(9) |          |
| N(5)–Co(3)–N(6)                            | 90.43(9) |          |
| O(1)–Co(1)–O(1) <sup>a</sup>               | –        | 180.00   |
| O(1)–Co(1)–N(1) <sup>a</sup>               | –        | 89.63(8) |
| O(1)–Co(1)–N(2) <sup>a</sup>               | –        | 92.21(8) |
| O(1) <sup>a</sup> –Co(1)–N(1)              | –        | 89.63(8) |
| N(1)–Co(1)–N(1) <sup>a</sup>               | –        | 180.00   |
| N(1)–Co(1)–N(2) <sup>a</sup>               | –        | 91.33(8) |
| O(1) <sup>a</sup> –Co(1)–N(2)              | –        | 92.21(8) |
| N(1) <sup>a</sup> –Co(1)–N(2)              | –        | 91.33(8) |
| N(2)–Co(1)–N(2) <sup>a</sup>               | –        | 180.00   |
| O(1) <sup>a</sup> –Co(1)–N(1) <sup>a</sup> | –        | 90.37(8) |
| O(1) <sup>a</sup> –Co(1)–N(2) <sup>a</sup> | –        | 87.79(8) |
| N(1) <sup>a</sup> –Co(1)–N(2) <sup>a</sup> | –        | 88.67(8) |
| O(3)–Co(2)–O(3) <sup>b</sup>               | –        | 180.00   |
| O(3)–Co(2)–N(5) <sup>b</sup>               | –        | 90.96(7) |
| O(3)–Co(2)–N(6) <sup>b</sup>               | –        | 91.94(7) |
| N(5)–Co(2)–N(6)                            | –        | 88.50(8) |
| O(3) <sup>b</sup> –Co(2)–N(5)              | –        | 90.96(7) |
| N(5)–Co(2)–N(5) <sup>b</sup>               | –        | 180.00   |

|                                            |   |           |
|--------------------------------------------|---|-----------|
| N(5)–Co(2)–N(6) <sup>b</sup>               | – | 91.50(8)  |
| O(3) <sup>b</sup> –Co(2)–N(6)              | – | 91.94(7)  |
| N(5) <sup>b</sup> –Co(2)–N(6)              | – | 91.50(8)  |
| N(6)–Co(2)–N(6) <sup>b</sup>               | – | 180.00    |
| O(3) <sup>b</sup> –Co(2)–N(5) <sup>b</sup> | – | 89.04(7)  |
| O(3) <sup>b</sup> –Co(2)–N(6) <sup>b</sup> | – | 88.06(7)  |
| N(5) <sup>b</sup> –Co(2)–N(6) <sup>b</sup> | – | 88.50(8)  |
| O(3)–Co(2)–N(6)                            | – | 88.06(7)  |
| O(3)–Co(2)–N(5)                            | – | 89.04(7)  |
| O(5)–Co(3)–N(17)                           | – | 90.44(7)  |
| O(5)–Co(3)–N(14)                           | – | 91.09(7)  |
| N(9)–Co(3)–N(14)                           | – | 176.94(8) |
| N(9)–Co(3)–N(17)                           | – | 91.24(8)  |
| N(10)–Co(3)–N(11)                          | – | 87.91(8)  |
| N(10)–Co(3)–N(14)                          | – | 83.66(8)  |
| N(10)–Co(3)–N(17)                          | – | 87.58(8)  |
| N(11)–Co(3)–N(14)                          | – | 88.57(8)  |
| N(11)–Co(3)–N(17)                          | – | 175.44(8) |
| N(14)–Co(3)–N(17)                          | – | 90.26(8)  |
| O(5)–Co(3)–N(10)                           | – | 174.38(8) |
| O(5)–Co(3)–N(11)                           | – | 93.99(8)  |
| O(5)–Co(3)–N(9)                            | – | 91.57(7)  |
| N(9)–Co(3)–N(11)                           | – | 89.74(8)  |

|                  |   |          |
|------------------|---|----------|
| N(9)–Co(3)–N(10) | – | 93.73(8) |
|------------------|---|----------|

Symmetry transformation: <sup>a</sup> = 1–X,1–Y, –Z and <sup>b</sup> = 1–X,2–Y,1–Z.
